# Supplementary material for: Using artificial intelligence for bladder cancer detection during cystoscopy and its impact on clinical outcomes: a protocol for a systematic review and meta-analysis
Source: HighWire-hosted journal article supplement (doi:10.1136/bmjopen-2024-089125), 2024-10-01
Supplement: bmjopen-2024-089125supp001_data_supplement.pdf [file bmjopen-2024-089125supp001_data_supplement.pdf]

## **Utilising artificial intelligence for bladder cancer detection during cystoscopy and its impact on clinical outcomes: A Protocol systematic review and meta-analysis**

The search terms for this systematic review are as follows:

((artificial intelligence OR machine intelligence OR computational intelligence OR neural network OR deep learning OR machine learning OR reinforcement learning OR convolutional neural network OR artificial neural network OR recurrent neural network OR deep neural network OR intelligent model OR predictive model OR computational model OR algorithm OR AI OR NN OR DL OR ML OR CNN OR ANN OR RNN OR DNN) AND (random forests OR support vector machines OR nearest neighbours OR logistic regression) AND ((Bladder AND (cancer OR malignant OR transitional cell or urothelial OR squamous cell OR adenocarcinoma OR papillary OR carcinoma in situ OR non muscle invasive OR lesions OR disease)) AND (cystoscop\* OR cystoscop\* images OR flexible cystoscopy OR cystourethroscopy )) AND (diagnos\* OR detect\*)).

Searches will be conducted on the following databases:

PubMed, MEDLINE, Embase, and Cochrane databases
